# Supplementary material for: Construction of stable bio-Pd catalysts for environmental pollutant remediation
Source: Royal Society of Chemistry journal article supplement (doi:10.1039/d1ra06465g), 2021-01-01
Supplement: d1ra06465g1.pdf [file d1ra06465g1.pdf]

## Supporting Information

### Construction of stable bio-Pd catalysts for environmental pollutant remediation

Huimei Chen\*, Ziniu Zhou, Wei Chen, Ziwei Xiang, Haiyan Nie, Weiguo Yu\*

Zhejiang Pharmaceutical College, Ningbo 315503, PR China

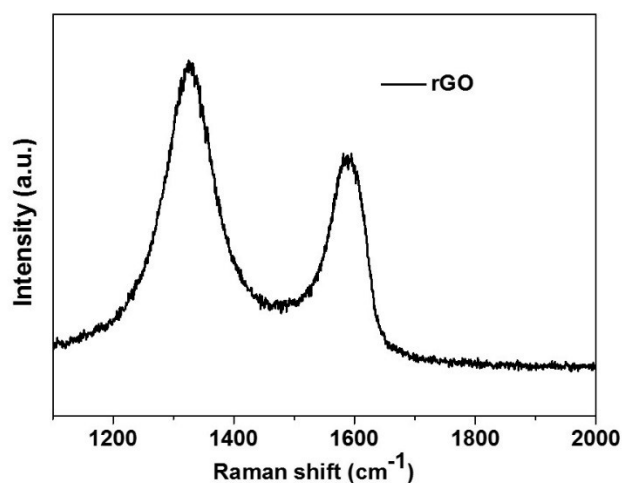

Fig. S1 Raman spectra of rGO

---

\* Corresponding authors. Tel.: (+86) 594-88225915; E-mail addresses: chengyi\_chm@163.com (H. Chen) and 183010318@qq.com (W. Yu)

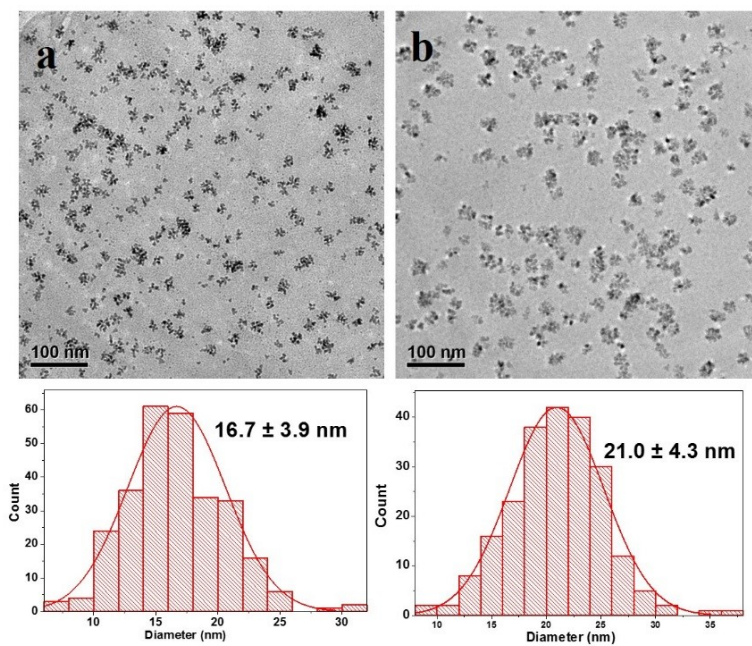

Fig. S2 TEM images of Pd/yeast/rGO catalysts with Pd particle mean size of (a) 16.7 nm and (b) 21.0 nm

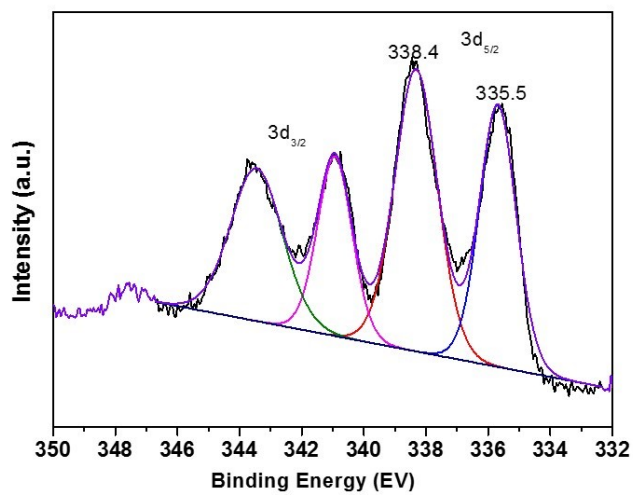

Fig. S3 XPS of the Pd 3d peaks of the Pd/yeast catalysts

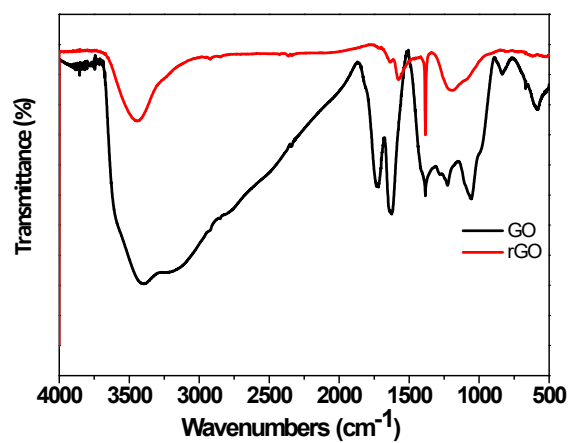

Fig. S4 FTIR spectra of GO and rGO

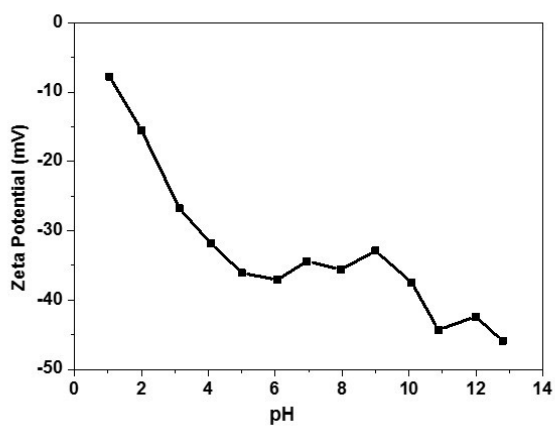

Fig. S5 Zeta potential of the Pd/yeast/rGO catalysts at different pH solution.

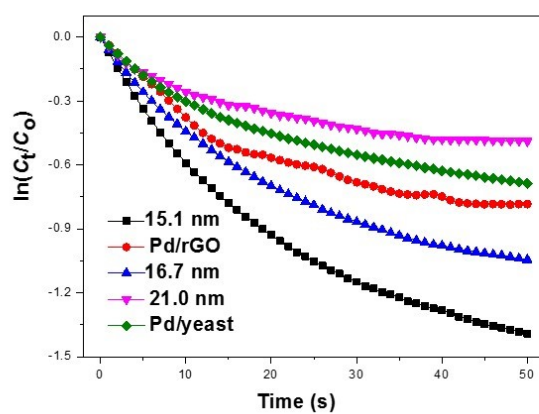

Fig. S6 Plot of  $\ln(C_t/C_0)$  versus time for the reduction of different particle mean size of Pd/yeast/rGO catalysts (15.1, 16.7 and 21 nm) and Pd/yeast catalyst, Pd/rGO.

Tab. S1 The kinetic constants of Pd/yeast/rGO catalyst after 7 cycles

| cycles | kinetic constant ( $\times 10^{-2} \text{ s}^{-1}$ ) |
|--------|------------------------------------------------------|
| 1      | 3.6                                                  |
| 2      | 2.9                                                  |
| 3      | 2.9                                                  |
| 4      | 2.6                                                  |
| 5      | 2.5                                                  |
| 6      | 2.4                                                  |
| 7      | 2.3                                                  |

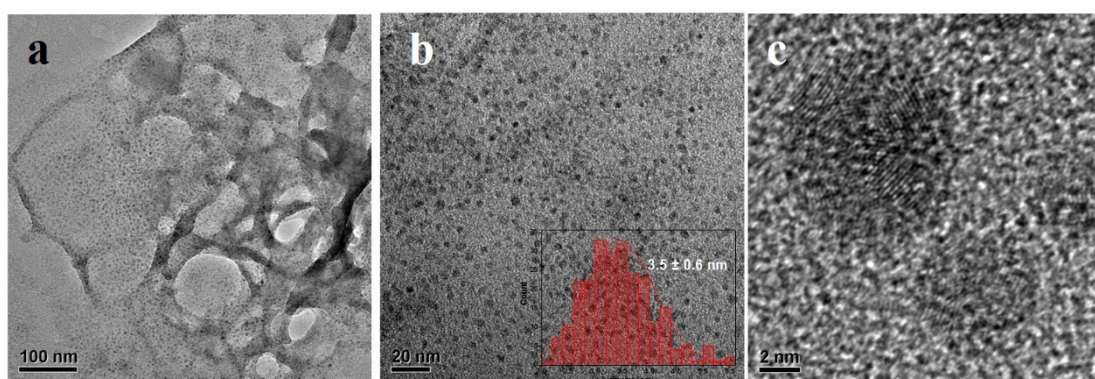

Fig. S7 TEM image of Pd/yeast/rGO catalysts after 7 cycles

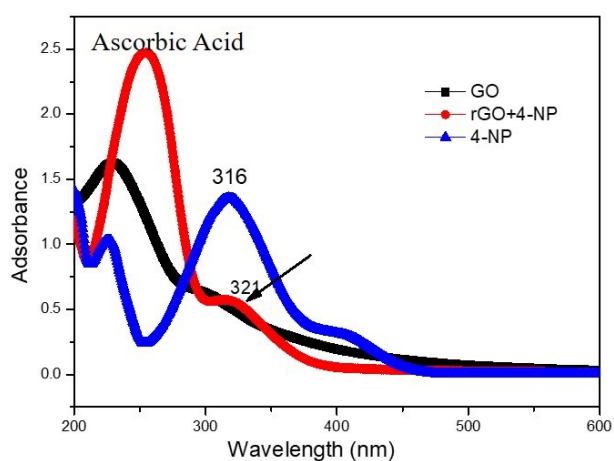

Fig. S8 UV-vis spectrogram of GO, 4-NP and rGO + 4-NP solutions

Tab. S2 Comparative characteristics of catalysts and catalytic performance to 4-NP

| Catalysts                                     | Catalysts dosage | 4-NP dosage                    | Kinetic constant (min <sup>-1</sup> ) | Ref.      |
|-----------------------------------------------|------------------|--------------------------------|---------------------------------------|-----------|
| Ag <sub>3</sub> PO <sub>4</sub> /Ni-Ti LDH/GO | 1 mg             | 4-NP (5 mL, 1 mM) solution     | 0.178                                 | 1         |
| Pd/RGO/Fe <sub>3</sub> O <sub>4</sub>         | 5 mg             | 4-NP (25 mL, 2.5 mM) solution  | 3.06                                  | 2         |
| MXene@PdNPs20                                 | 0.3 mg           | 4-NP (2 mL, 5 mM) solution     | 10.8                                  | 3         |
| Pd/walnut shell                               | 5 mg             | 4-NP (25 mL, 2.5 mM) solution  | (1 min)                               | 4         |
| 3D Pd/TiO <sub>2</sub> -scaffolds             | --               | 4-NP (2 mL, 14.38 mM) solution | 2.69                                  | 5         |
| Hg/Pd Alloy Nanoparticles                     | 5 mg             | 4-NP (0.5 mL, 1 mM) solution   | 3.5                                   | 6         |
| Pd/Graphene Catalyst                          | 4 mg             | 4-NP (40 mL, 0.3 mM) solution  | 0.666                                 | 7         |
| Pd/yeast/rGO                                  | 0.24 mg          | 4-NP (0.7 mL, 1 mM) solution   | 2.16                                  | This work |

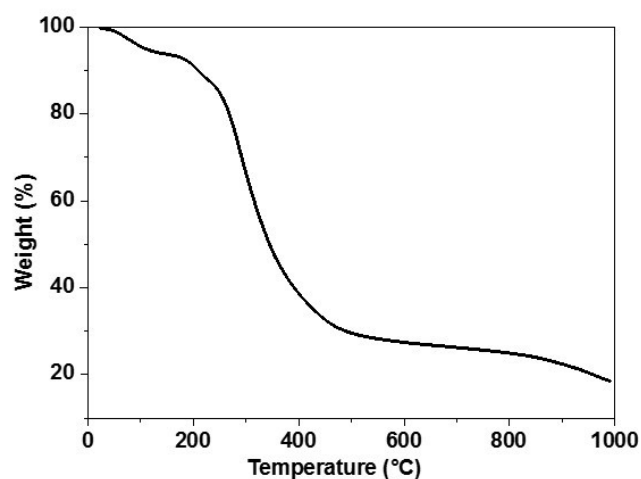

Fig. S9 TGA result of *Pichia pastoris* GS115

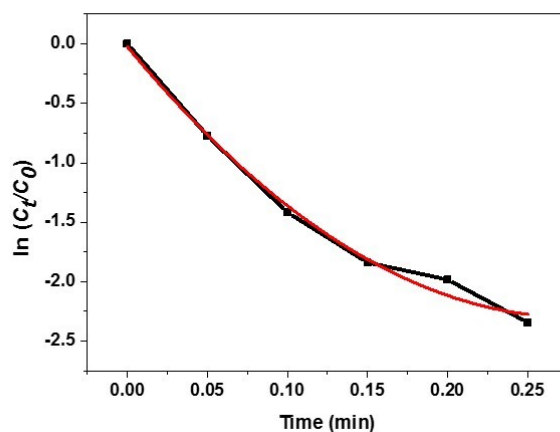

Fig. S10 plot of  $\ln(C_t/C_0)$  versus time of Pd/yeast/rGO catalysts in the decolorization of MB

### References

1. H. Deng, J. Yin, J. Ma, J. Zhou, L. Zhang, L. Gao and T. Jiao, *Applied Surface Science*, 2021, **543**, 148821.
2. M. Atarod, M. Nasrollahzadeh and S. Mohammad Sajadi, *Journal of Colloid and Interface Science*, 2016, **465**, 249-258.
3. J. Yin, L. Zhang, T. Jiao, G. Zou, Z. Bai, Y. Chen, Q. Zhang, M. Xia and Q. Peng, *Nanomaterials (Basel, Switzerland)*, 2019, **9**.
4. M. Bordbar and N. Mortazavimaneh, *Environmental science and pollution research international*, 2017, **24**, 4093-4104.
5. T. Liu, Y. Sun, B. Jiang, W. Guo, W. Qin, Y. Xie, B. Zhao, L. Zhao, Z. Liang and L. Jiang, *ACS Appl Mater Interfaces*, 2020, **12**, 28100-28109.
6. V. K. Harika, H. K. Sadhanala, I. Perelshtein and A. Gedanken, *Ultrasonics sonochemistry*, 2020, **60**, 104804.
7. Q. Zhao, D. Bu, Z. Li, X. Zhang and L. Di, *Nanomaterials (Basel, Switzerland)*, 2021, **11**.
